# Supplementary material
Source: publisher site journal article supplement (http://kjim.org/upload/media/kjim-2022-401-Supplementary-Fig-7.pdf)
Supplement: Supplementary file 1 [file kjim-2022-401-Supplementary-Fig-7.pdf]

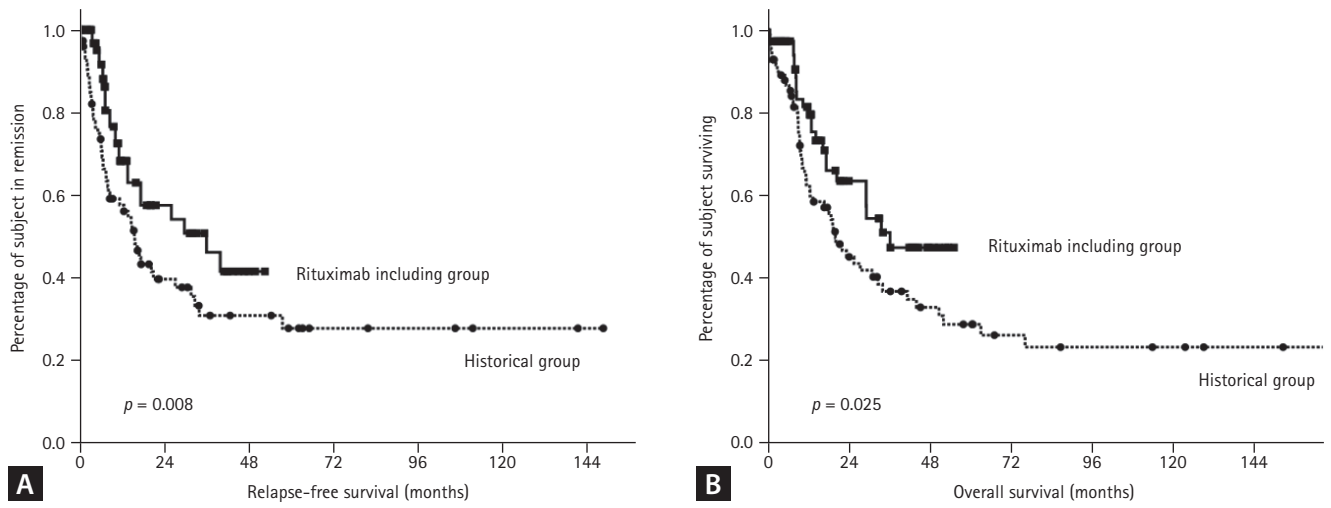

**Supplementary Figure 7.** Kaplan-Meier curve. Patients with rituximab group exhibited better survivals than historical patient group. (A) Relapse-free survival. (B) Overall survival.
